# Supplementary material for: Energy driven self-organization in nanoscale metallic liquid films
Source: Royal Society of Chemistry journal article supplement (doi:10.1039/b906281p), 2009-01-01
Supplement: b906281p.pdf [file b906281p.pdf]

## Supplementary Information (Updated July 09-2009)

### Temperature model

We have used the thermal model described in detail in Ref. 19 of the manuscript for the heating of thin metal films on SiO<sub>2</sub> substrates. Here we summarize the relevant information.

The 1D laser heating equation of the thermal model is:

$$\frac{dT}{dt} = [1 - R(h)] \frac{E_0}{\sqrt{2\pi}\sigma} \frac{[1 - \exp(-\alpha_m h)]}{(\rho C)_m h} f(t) - \frac{q_s(t)}{(\rho C)_m h}$$

Where the Gaussian laser pulse shape is  $f(t) = \exp\left(\frac{-(t-\mu)^2}{2\sigma^2}\right)$ ,  $E_0$  is the laser energy density and  $q_s$  is the conductive heat transfer to the substrate. The solution of this heat equation is the description of temperature T as a function of time t and thickness h of the film for the Gaussian shaped laser pulse. The solution is given in terms of a Laplace transform as:

$$T(t, h) = T_0 + S'(h) \int_0^t \exp(-f^2(t-u))^2 + g(t-u) + K(h)^2 u \cdot \operatorname{erfc}(K(h)\sqrt{u}) du$$

where  $u$  is the Laplace transformation variable and the other quantities are:

- $f = \frac{1}{\sqrt{2}\sigma}$ , where  $\sigma = \frac{t_p}{2 \cdot \sqrt{2 \cdot \ln(2)}}$  is the standard deviation of the Gaussian laser pulse of pulse width  $t_p = 9 \times 10^{-9}$  s
- $g = 2t_p f^2$
- $S'(h) = [1 - R(h)] \frac{E_0}{\sqrt{2\pi}\sigma} \frac{[1 - \exp(-\alpha_m h)]}{(\rho C)_m h} \exp(-f^2 t_p^2)$  where  $\alpha_m$  is metal the absorption coefficient at the laser wavelength of 266 nm,  $\rho$  is the density,  $C$  is the heat capacity and m designates the metal
- $R(h)$  is the thickness-dependent reflectivity of the metal-substrate bilayer and is given by:

$$- R(h)_{Co} = \frac{0.426e^{9.543 \cdot 10^7 h} + 0.321e^{-9.543 \cdot 10^7 h} - 0.699 \cos(6.803 \cdot 10^7 h) + 0.242 \sin(6.803 \cdot 10^7 h)}{e^{9.543 \cdot 10^7 h} + 0.137e^{-9.5429 \cdot 10^7 h} + 0.06832 \cos(6.803 \cdot 10^7 h) + 0.736 \sin(6.803 \cdot 10^7 h)}$$

$$- R(h)_{Ag} = \frac{0.261e^{6.345 \cdot 10^7 h} + 0.180e^{-6.345 \cdot 10^7 h} - 0.391 \cos(6.54 \cdot 10^7 h) + 0.185 \sin(6.54 \cdot 10^7 h)}{e^{6.345 \cdot 10^7 h} + 0.0468e^{-6.345 \cdot 10^7 h} + 0.180 \cos(6.54 \cdot 10^7 h) + 0.393 \sin(6.54 \cdot 10^7 h)}$$

- and  $K(h) = \frac{\sqrt{(\rho C_{eff} k)_s}}{(\rho C_{eff})_m h}$ , where  $k$  is the substrate thermal conductivity and s designates substrate parameters and  $C_{eff}$  is the effective value of the film heat capacity during heating, cooling, and changing phase.

The various quantities used in the calculation are noted in table 1

| Material                   | C in J/Kg-K | $\rho$ Kg/m <sup>3</sup> | $\alpha(266\text{nm})$ in m <sup>-1</sup> | k in W/m-K |
|----------------------------|-------------|--------------------------|-------------------------------------------|------------|
| Ag                         | 283         | $9.33 \cdot 10^3$        | $6.344 \cdot 10^7$                        |            |
| Co                         | 686         | $7.67 \cdot 10^3$        | $9.543 \cdot 10^7$                        |            |
| SiO <sub>2</sub> substrate | 937         | $2.20 \cdot 10^3$        | $\approx 0$                               | 1.4        |

Table 1: Metal and substrate quantities
